# Supplementary material for: Polyol-Mediated Synthesis of V2O5–WO3/TiO2 Catalysts for Low-Temperature Selective Catalytic Reduction with Ammonia
Source: MDPI journal article supplement (doi:10.3390/nano12203644), 2022-10-18
Supplement: s1 [file s1]

## Supplementary Information

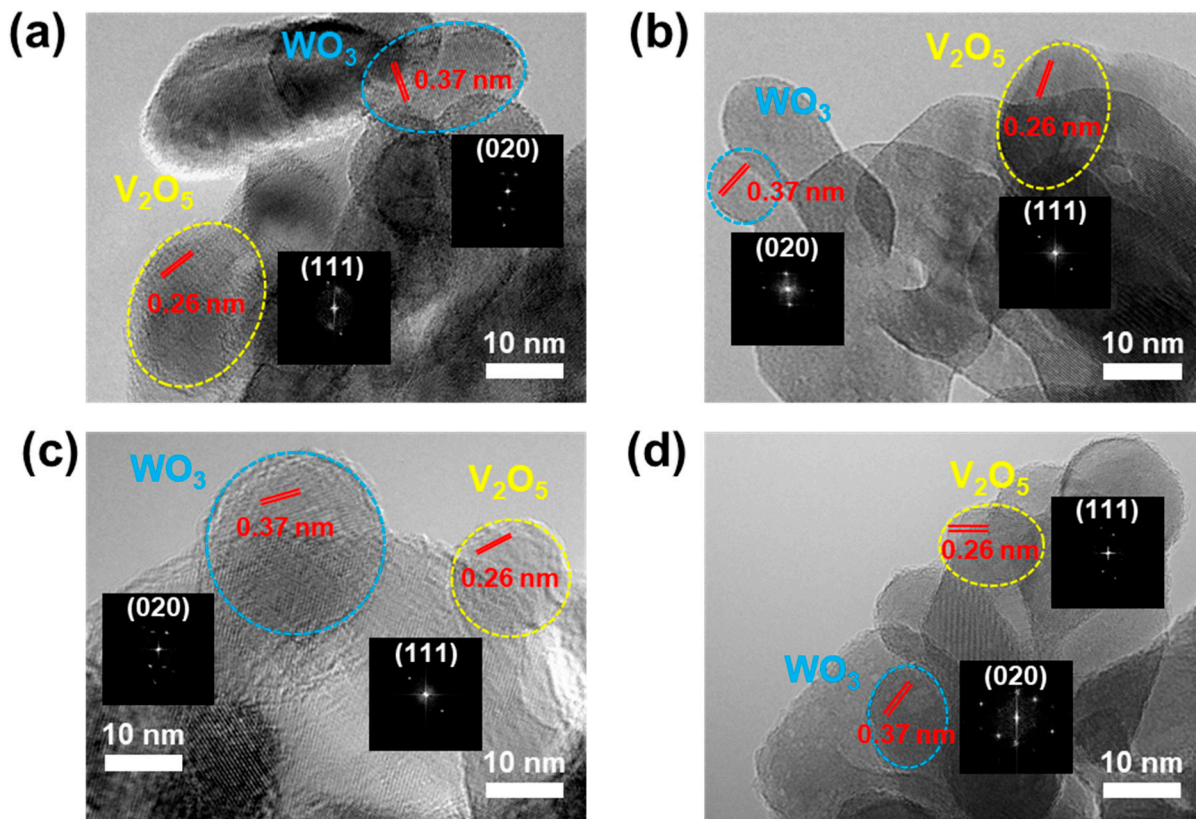

**Figure S1.** Transmission electron microscope (TEM) images and selected area electron diffraction (SAED) patterns of (a)  $\text{V}_2\text{O}_5(\text{IM})-\text{WO}_3(\text{IM})$ , (b)  $\text{V}_2\text{O}_5(\text{IM})-\text{WO}_3(\text{P})$ , (c)  $\text{V}_2\text{O}_5(\text{P})-\text{WO}_3(\text{IM})$ , and (d)  $\text{V}_2\text{O}_5(\text{P})-\text{WO}_3(\text{P})$ .

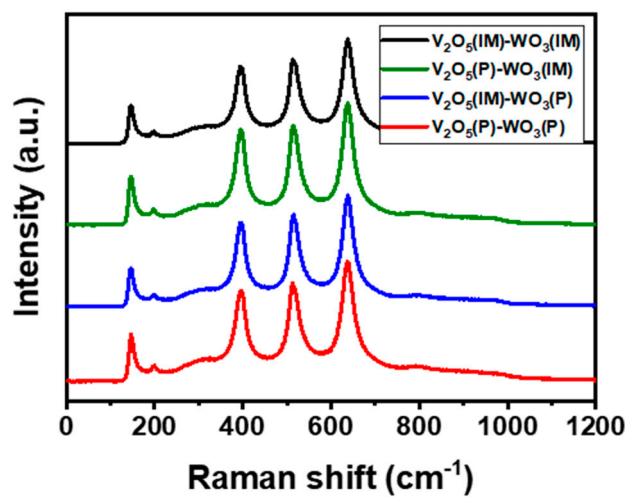

**Figure S2.** Raman spectra of  $\text{V}_2\text{O}_5(\text{IM})-\text{WO}_3(\text{IM})$ ,  $\text{V}_2\text{O}_5(\text{IM})-\text{WO}_3(\text{P})$ ,  $\text{V}_2\text{O}_5(\text{P})-\text{WO}_3(\text{IM})$ , and  $\text{V}_2\text{O}_5(\text{P})-\text{WO}_3(\text{P})$ .

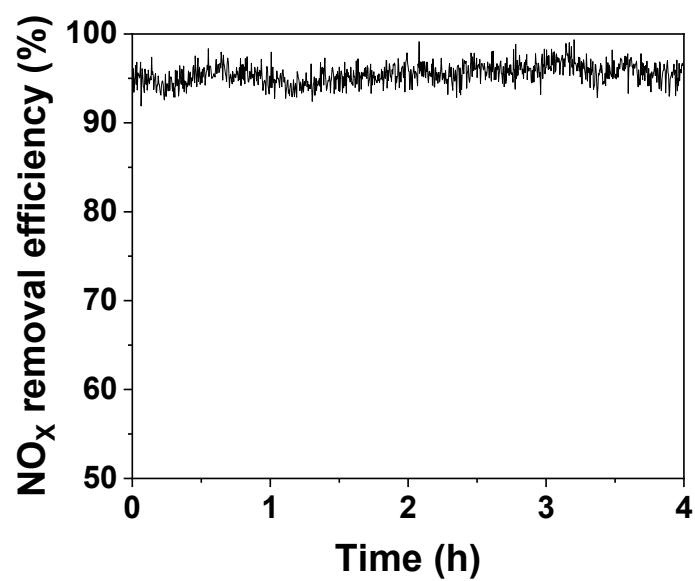

**Figure S3.** NO<sub>x</sub> removal efficiency of V<sub>2</sub>O<sub>5</sub>(P)–WO<sub>3</sub>(P) measured for 4h at 250 °C. Reaction conditions: [NO] = [NH<sub>3</sub>] = [SO<sub>2</sub>] = 300 ppm, [O<sub>2</sub>] = 5 vol.%, N<sub>2</sub> as balance, and [GHSV] = 60,000 h<sup>-1</sup>.

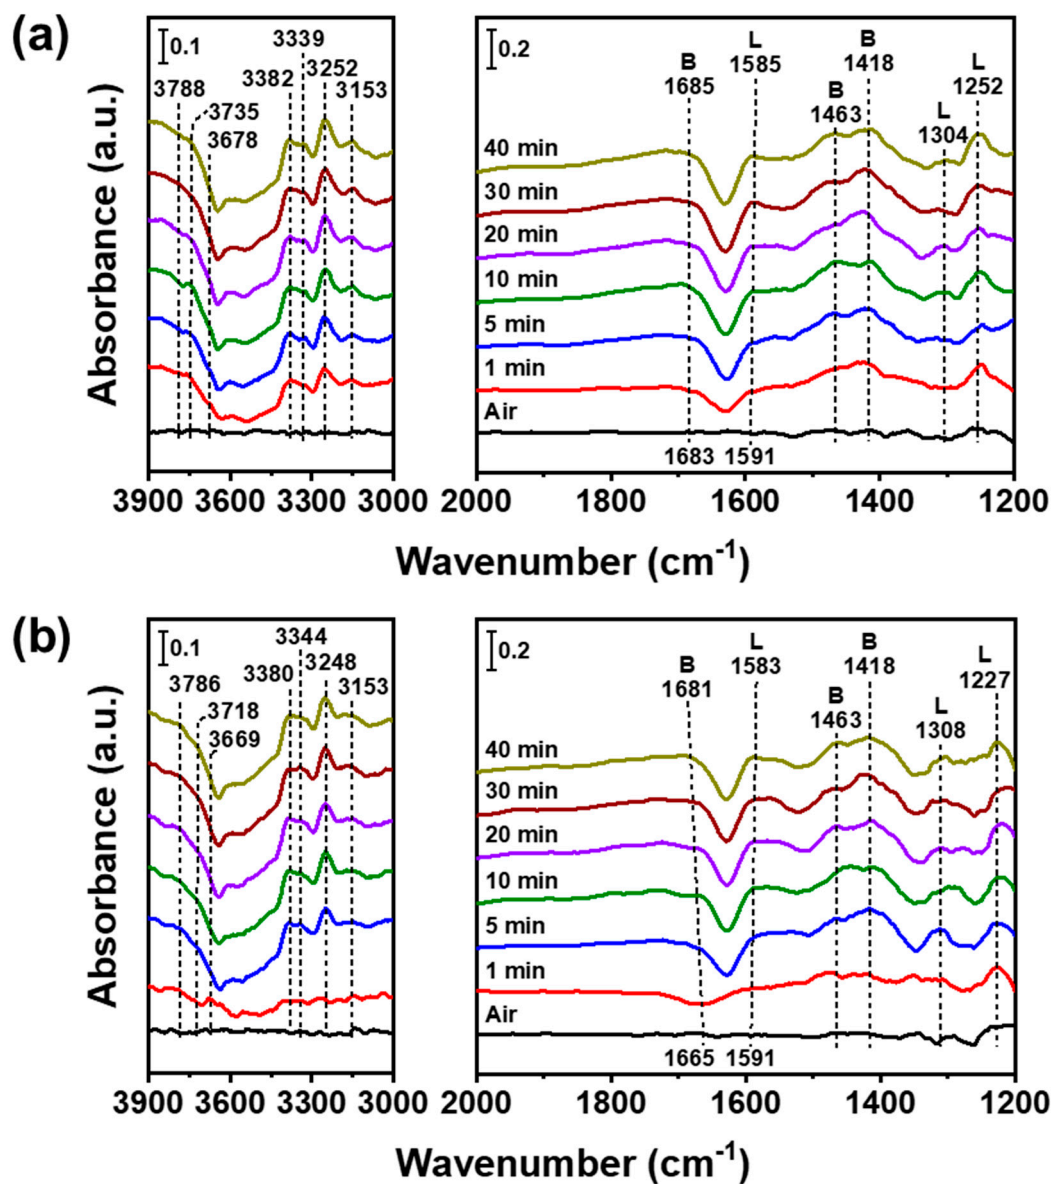

**Figure S4.** *In situ* Fourier-transform infrared spectra of ammonia adsorption depending on reaction time over (a)  $\text{V}_2\text{O}_5(\text{IM})\text{-WO}_3(\text{P})$  and (b)  $\text{V}_2\text{O}_5(\text{P})\text{-WO}_3(\text{IM})$  at 200 °C. Conditions:  $[\text{NH}_3] = 500$  ppm (when used) and  $\text{N}_2$  as balance.

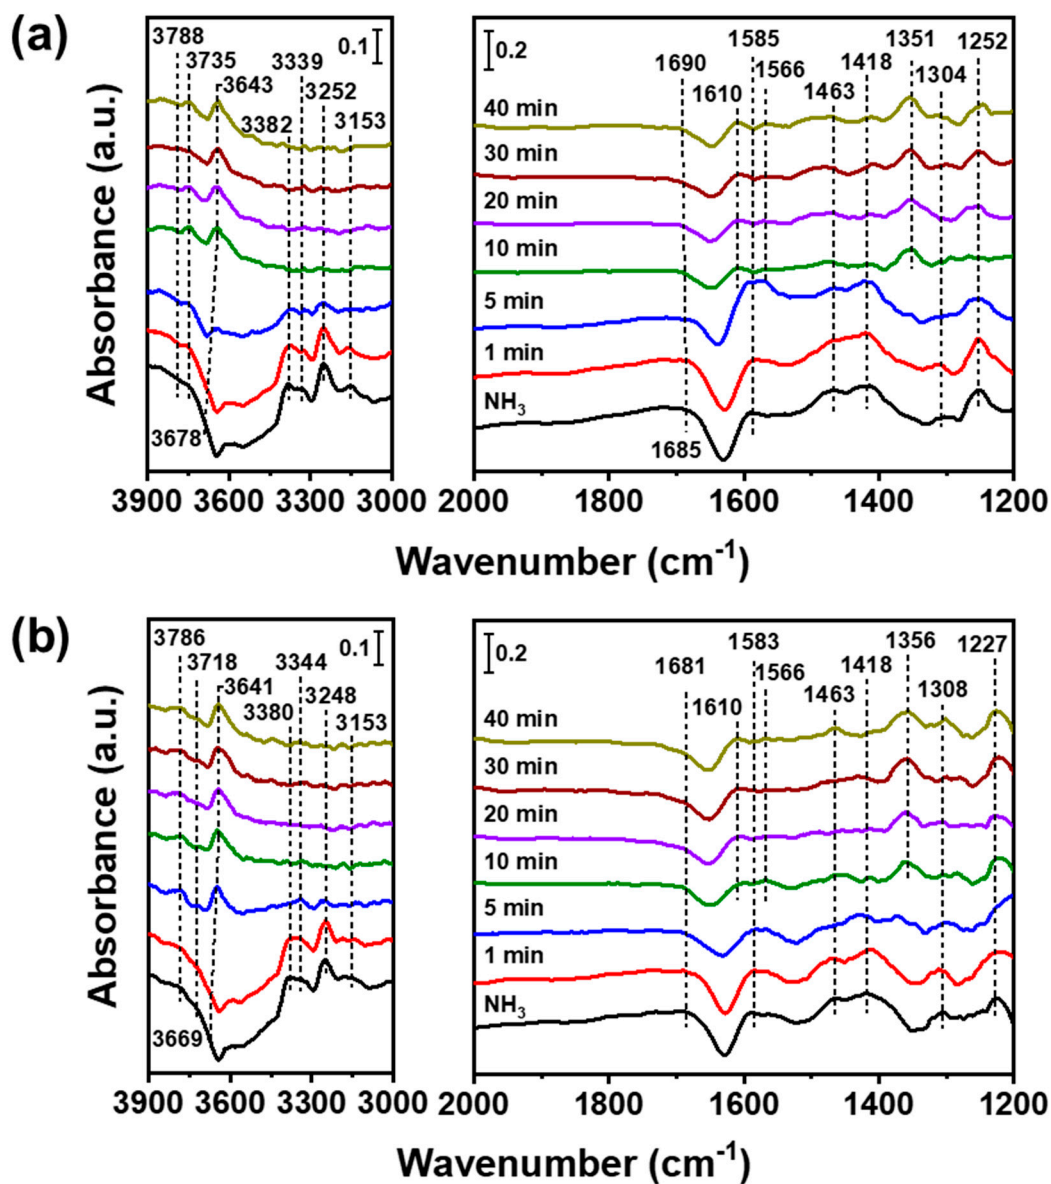

**Figure S5.** *In situ* Fourier-transform infrared spectra of NO and O<sub>2</sub> reacted with pre-adsorbed NH<sub>3</sub> over (a) V<sub>2</sub>O<sub>5</sub>(IM)–WO<sub>3</sub>(P) and (b) V<sub>2</sub>O<sub>5</sub>(P)–WO<sub>3</sub>(IM) at 200 °C. Conditions: [NO] = 500 ppm (when used), [O<sub>2</sub>] = 5 vol.% (when used), and N<sub>2</sub> as balance.
